# Supplementary material for: Transcriptome profiling of kenaf (Hibiscus cannabinus L.) under plumbic stress conditions implies the involvement of NAC transcription factors regulating reactive oxygen species-dependent programmed cell death
Source: PeerJ journal article supplement (doi:10.7717/peerj.8733), 2020-03-10

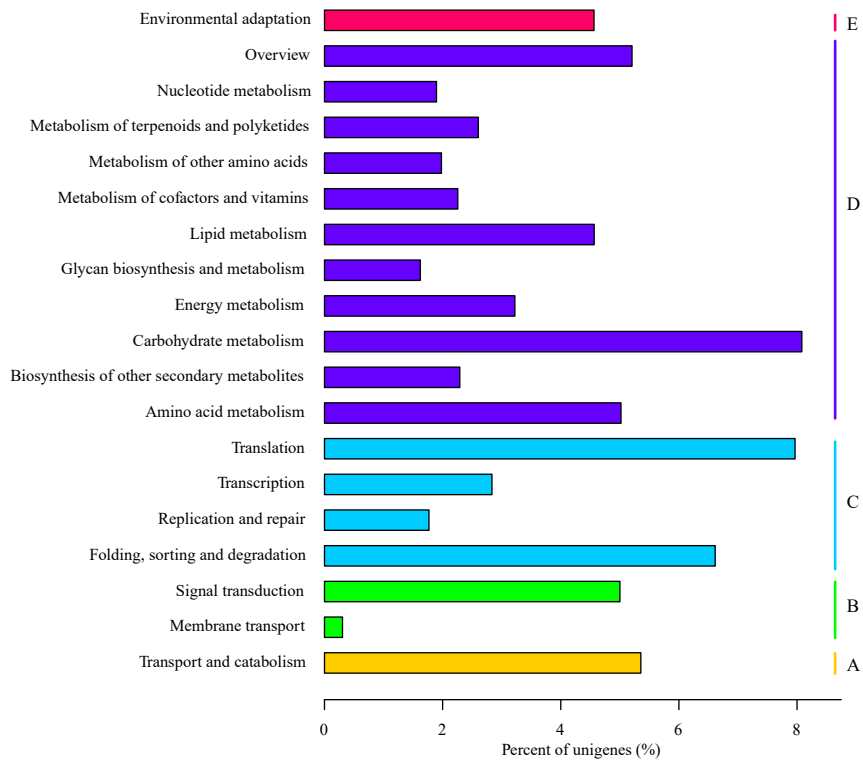

Supplement: Supplemental_Figure_3.pdf [file Supplemental_Figure_3.pdf]
