# Supplementary material for: Transcriptome profiling of kenaf (Hibiscus cannabinus L.) under plumbic stress conditions implies the involvement of NAC transcription factors regulating reactive oxygen species-dependent programmed cell death
Source: PeerJ journal article supplement (doi:10.7717/peerj.8733), 2020-03-10
Supplement: Supplemental_Figure_4.pdf [file Supplemental_Figure_4.pdf]

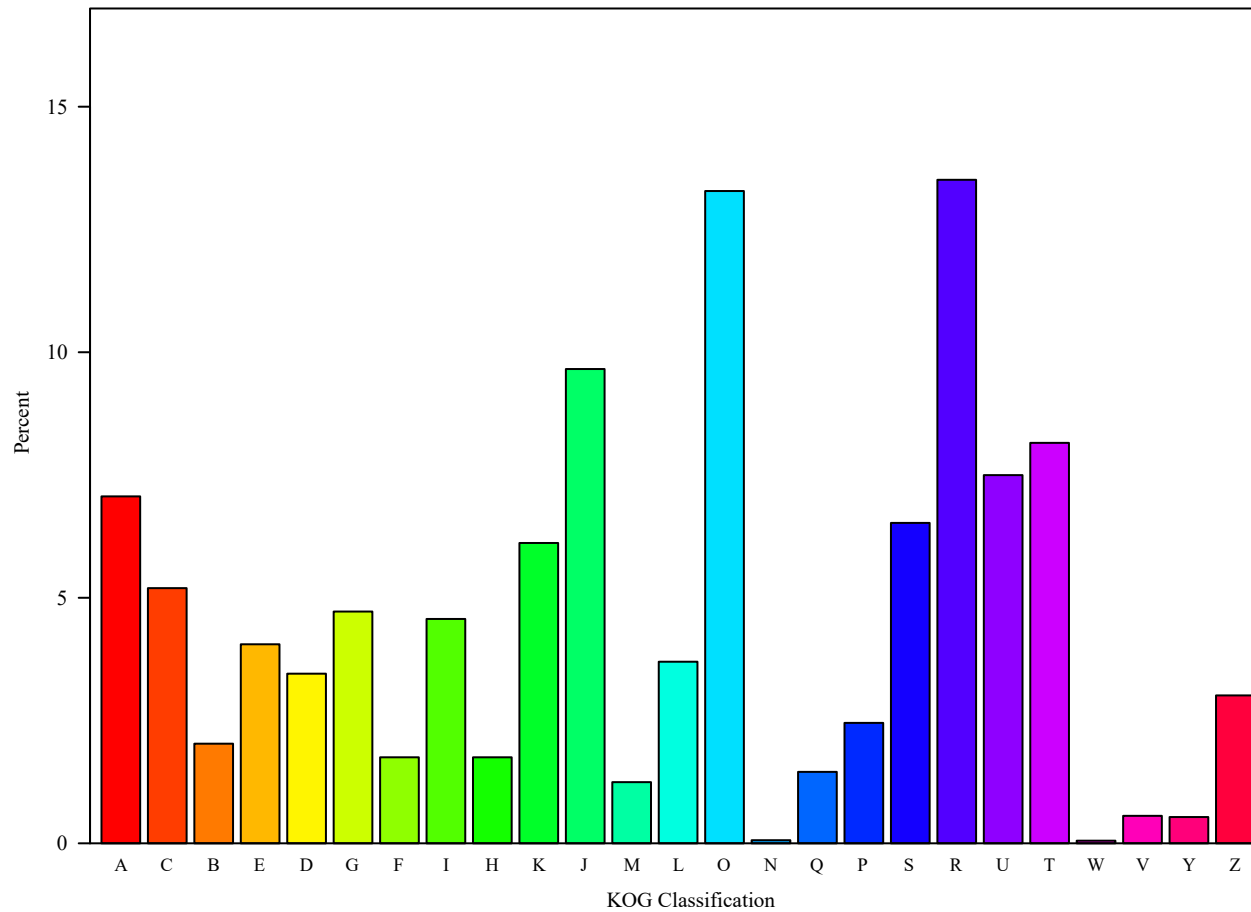

- [A] RNA processing and modification
- [B] Chromatin structure and dynamics
- [C] Energy production and conversion
- [D] Cell cycle control, cell division, chromosome partitioning
- [E] Amino acid transport and metabolism
- [F] Nucleotide transport and metabolism
- [G] Carbohydrate transport and metabolism
- [H] Coenzyme transport and metabolism
- [I] Lipid transport and metabolism
- [J] Translation, ribosomal structure and biogenesis
- [K] Transcription
- [L] Replication, recombination and repair
- [M] Cell wall/membrane/envelope biogenesis
- [N] Cell motility
- [O] Posttranslational modification, protein turnover, chaperones
- [P] Inorganic ion transport and metabolism
- [Q] Secondary metabolites biosynthesis, transport and catabolism
- [R] General function prediction only
- [S] Function unknown
- [T] Signal transduction mechanisms
- [U] Intracellular trafficking, secretion, and vesicular transport
- [V] Defense mechanisms
- [W] Extracellular structures
- [X] Nuclear structure
- [Y] Nuclear structure
- [Z] Cytoskeleton
