# Supplementary material for: Transcriptome profiling of kenaf (Hibiscus cannabinus L.) under plumbic stress conditions implies the involvement of NAC transcription factors regulating reactive oxygen species-dependent programmed cell death
Source: PeerJ. 2020 Mar 10;8:e8733. doi: 10.7717/peerj.8733 (PMC7069409; doi:10.7717/peerj.8733)
Supplement: Tables S1–S10 [file peerj-08-8733-s007.xlsx]

## Sheet: ST1
Supplemental Table 1. Brief information regarding how the unigenes were functionally annotated based on seven databases
Databases	Description	Software and parameters
Nr	NCBI non-redundant protein sequences	diamond v0.8.22: e-value = 1e-5, --moresensitive
Nt	NCBI nucleotide sequences	NCBI blast 2.2.28+: e-value = 1e-5
Pfam	Protein family	HMMER 3.0 package, hmmscan: e-value = 0.01
KOG	euKaryotic Ortholog Groups	diamond v0.8.22: e-value = 1e-3, --moresensitive
Swiss-Prot	A manually annotated and reviewed protein sequence database	diamond v0.8.22: e-value = 1e-5, --moresensitive
KEGG	Kyoto Encyclopedia of Genes and Genomes	KAAS, KEGG Automatic Annotation Server: e-value= 1e-10
GO	Gene Ontology	Blast2GO v2.5: e-value = 1e-6

## Sheet: ST2
Supplemental Table 2. Primers for the qRT-PCR analysis of randomly selected unigenes
Unigenes	family	Forward primer	Reverse primer
Cluster-5711.10506	NAC	ATTTCAGTGCATCCGCTAT	TTCTCACCCATCTTGGCT
Cluster-5711.10507	NAC	CTTCTGTGGCAACAATCGG	CATGGATTGGTTCGACGAG
Cluster-5711.10680	NAC	TTTGAGCATTGATGTGAACCC	AACGATCAAGATCCTCTAATGG
Cluster-5711.108716	NAC	CACTCCCAAATCTACTGCAC	GGCATGTTTCGTCTTCCG
Cluster-5711.35745	NAC	CCCTGCTTCTCCAATCATAAC	CTCGGAACTGGGAATTGTG
Cluster-5711.107017	ERF	GAAACAGCAGAGGTTAGTTCAA	TTCCGAGCCAAACCCTTA
Cluster-5711.107018	ERF	GTAAGGGTTTGGCTGGGA	GTTGAGTATCGCCGCTGA
Cluster-5711.101858	TCP	ATAAATCTCAAACCGTGTCGT	GAAACTCTTGCCTACAACTGC
Cluster-5711.64302	GAPDH	CTTCGCTCTTCCTTATTCGGTA	TGACCCATCCCAACCATAAC

## Sheet: ST3
Supplemental Table 3. General details regarding the transcriptome sequencing results
Sample	Raw reads	Clean reads	Clean bases	Error (%)	Q20 (%)	Q30 (%)	GC (%)
CK_1	85757838	82831746	12.42G	0.01	97.97	94.75	45.59
CK_2	74139794	71651552	10.75G	0.01	97.94	94.66	45.7
Pb_1	77173798	74577722	11.19G	0.01	97.98	94.77	45.35
Pb_2	70427274	68062442	10.21G	0.01	98.03	94.87	45.31

## Sheet: ST4
Supplemental Table 4. Overview of the assembled transcripts and unigenes
	Number	Min length	Mean length	Median length	Max length	N50	N90	Total nucleotides
Transcripts	193978	201	864	444	16966	1628	317	167635845
Genes	136854	201	1109	691	16966	1809	473	151754502
N50 and N90 denoted the transcript length when adding the sequence lengths from longest to shortest, till the sumed length reached no less than 50% or 90%, respectively, of the total nucleotides.

## Sheet: ST5
Supplemental Table 5. Annotation of unigenes based on seven databases
Database	Number	Percentage (%)
Nr	86376	63.11
Nt	78124	57.08
KEGG	32173	23.5
SP	63368	46.3
Pfam	59188	43.24
GO	59384	43.39
KOG	20553	15.01
All	12414	9.07
At lest one	94795	69.26
Total	136854	100

## Sheet: ST6
Supplemental Table 6. Annotation of the differentially expressed NAC TF genes based on a BLAST search of the Arabidopsis database
Unigene IDs	Arabisopsis ortholog	Possible fuction	Reference
Cluster-5711.10506	AT5G18270	Programmed cell death	ANAC087 and ANAC046 control distinct aspects of programmed cell death in the Arabidopsis columella and lateral root cap
Cluster-5711.10507	AT5G18270	Programmed cell death	ANAC087 and ANAC046 control distinct aspects of programmed cell death in the Arabidopsis columella and lateral root cap
Cluster-5711.10680	AT5G07680	Programmed cell death	An Arabidopsis NAC transcription factor NAC4 promotes pathogen‐induced cell death under negative regulation by microRNA164
Cluster-5711.108716	AT2G43000	Response to ROS	JUNGBRUNNEN1, a Reactive Oxygen Species-Responsive NAC Transcription Factor, Regulates Longevity in Arabidopsis
	AT2G43000	Confer drought stress	JUNGBRUNNEN1 Confers Drought Tolerance Downstream of the HD-Zip I Transcription Factor AtHB13
Cluster-5711.35745	AT5G07680	Programmed cell death	An Arabidopsis NAC transcription factor NAC4 promotes pathogen‐induced cell death under negative regulation by microRNA164

## Sheet: ST7
Supplemental Table 7. The MDA contents in the control and treated samples
Samples	532nm	600nm	△A	Weight (g)	MDA (nmol/g FW)
CK	0.0958	0.0686	0.0272	0.101	13.8962
	0.0738	0.0471	0.0267	0.1012	13.6138
	0.0697	0.0445	0.0252	0.1006	12.9256
Pb	0.0895	0.057	0.0325	0.1008	16.6369
	0.0805	0.0477	0.0328	0.101	16.7572
	0.0795	0.049	0.0305	0.1009	15.5976

## Sheet: ST8
Supplemental Table 8. The PRO contents in the control and treated samples
Samples	A	Wright (g)	Proline content (μg/g FW)
CK	0.1028	0.1001	40.2414
	0.1001	0.1013	38.7412
	0.101	0.1011	39.1596
Pb	0.1511	0.1008	58.3619
	0.1474	0.1011	56.7834
	0.1513	0.1015	58.0351

## Sheet: ST9
Supplemental Table 9. The enzyme activities of POD in the control and treated samples
Samples	Wright (g)	Protein concentration (mg/mL)	A1	A2	∆A	POD (U/mg prot)	POD (U/g FW)
CK	0.101	1.64041	0.311	0.4062	0.0952	2.32137	37.703
	0.1012	1.58877	0.2741	0.3656	0.0915	2.30367	36.166
	0.1006	1.68134	0.3237	0.4234	0.0997	2.37191	39.6421
Pb	0.1008	1.91266	0.2574	0.3388	0.0814	1.70234	32.3016
	0.101	2.02642	0.225	0.3086	0.0836	1.6502	33.1089
	0.1009	2.01928	0.3464	0.4287	0.0823	1.63029	32.6264

## Sheet: ST10
Supplemental Table 10. The enzyme activities of CAT in the control and treated samples
Samples	A1	A2	∆A	Protein concentration (mg/mL)	CAT (U/mg prot)	Weight (g)	CAT (U/g FW)
CK	0.5751	0.5689	0.0062	1.64041	3.46962	0.101	56.3525
	0.5539	0.5469	0.007	1.58877	4.04465	0.1012	63.498
	0.5523	0.5459	0.0064	1.68134	3.49435	0.1006	58.4016
Pb	0.5962	0.592	0.0042	1.91266	2.01583	0.1008	38.25
	0.6448	0.6405	0.0043	2.02642	1.94797	0.101	39.0832
	0.6226	0.6189	0.0037	2.01928	1.68209	0.1009	33.663
